# Supplementary material for: Reservoir Operators React to Uncertainty in Snowmelt Runoff Forecasts
Source: Atypon-hosted journal article supplement (doi:10.1061/(asce)wr.1943-5452.0001437), 2021-07-19
Supplement: supplemental_materials_wr.1943-5452.0001437_stillinger.pdf [file supplemental_materials_wr.1943-5452.0001437_stillinger.pdf]

## SUPPLEMENTAL MATERIALS

*ASCE Journal of Water Resources Planning and Management*

# Reservoir Operators React to Uncertainty in Snowmelt Runoff Forecasts

Timbo Stillinger, Christopher Costello, Roger C. Bales,  
and Jeff Dozier

**DOI:** 10.1061/JPEODX.0000295

© ASCE 2021

[www.ascelibrary.org](http://www.ascelibrary.org)

**Table S1. Characteristics of the reservoir datasets that were aggregated to the basin level in the panel data model**

| Basin attributes |                               |          |           |                                           | Individual reservoir attributes |                                                   |                        |              |              |                     |          |                                     |                    |           |          |
|------------------|-------------------------------|----------|-----------|-------------------------------------------|---------------------------------|---------------------------------------------------|------------------------|--------------|--------------|---------------------|----------|-------------------------------------|--------------------|-----------|----------|
| River basin      | Forecast and release location | Latitude | Longitude | Basin storage capacity (Km <sup>3</sup> ) | Reservoirs                      | Drainage area above reservoirs (Km <sup>2</sup> ) | Precipitation stations | Snow courses | Snow pillows | Name                | Operator | Storage capacity (Km <sup>3</sup> ) | Elevation (meters) | Longitude | Latitude |
| Sacramento       | Sacramento above Bend         | -122.186 | 40.289    | 6.1                                       | 8                               | 17262                                             | 8                      | 12           | 10           | Iron Canyon         | PGE      | 0.03                                | 815                | -121.981  | 41.045   |
|                  |                               |          |           |                                           |                                 |                                                   |                        |              |              | Whiskeytown         | USBR     | 0.30                                | 369                | -122.537  | 40.598   |
|                  |                               |          |           |                                           |                                 |                                                   |                        |              |              | McCloud             | PGE      | 0.04                                | 823                | -122.074  | 41.135   |
|                  |                               |          |           |                                           |                                 |                                                   |                        |              |              | Britton             | PGE      | 0.05                                | 836                | -121.676  | 41.022   |
|                  |                               |          |           |                                           |                                 |                                                   |                        |              |              | Pit No. 7           | PGE      | 0.04                                | 316                | -122.015  | 40.843   |
|                  |                               |          |           |                                           |                                 |                                                   |                        |              |              | Pit No. 6           | PGE      | 0.02                                | 10                 | -122.001  | 40.842   |
|                  |                               |          |           |                                           |                                 |                                                   |                        |              |              | Shasta              | USBR     | 5.61                                | 325                | -122.42   | 40.718   |
| Feather          | Feather at Oroville           | -121.547 | 39.522    | 6.7                                       | 11                              | 9342                                              | 8                      | 22           | 10           | Keswick             | USBR     | 0.03                                | 182                | -122.4457 | 40.6121  |
|                  |                               |          |           |                                           |                                 |                                                   |                        |              |              | Oroville            | CADWR    | 4.36                                | 274                | -121.493  | 39.54    |
|                  |                               |          |           |                                           |                                 |                                                   |                        |              |              | Almanor             | PGE      | 1.61                                | 1402               | -121.173  | 40.218   |
|                  |                               |          |           |                                           |                                 |                                                   |                        |              |              | Bucks               | PGE      | 0.13                                | 1575               | -121.202  | 39.897   |
|                  |                               |          |           |                                           |                                 |                                                   |                        |              |              | Little Grass Valley | SFWP     | 0.11                                | 1538               | -121.019  | 39.724   |
|                  |                               |          |           |                                           |                                 |                                                   |                        |              |              | Davis               | CADWR    | 0.10                                | 1758               | -120.467  | 39.883   |
|                  |                               |          |           |                                           |                                 |                                                   |                        |              |              | Sly Creek           | SFWP     | 0.08                                | 1078               | -121.116  | 39.584   |
|                  |                               |          |           |                                           |                                 |                                                   |                        |              |              | Frenchman           | CADWR    | 0.07                                | 1682               | -120.183  | 39.883   |
|                  |                               |          |           |                                           |                                 |                                                   |                        |              |              | Butt Valley         | PGE      | 0.06                                | 1263               | -121.186  | 40.187   |
|                  |                               |          |           |                                           |                                 |                                                   |                        |              |              | Mountain Meadows    | PGE      | 0.03                                | 1538               | -121.017  | 40.283   |
|                  |                               |          |           |                                           |                                 |                                                   |                        |              |              | Antelope            | CADWR    | 0.03                                | 1512               | -120.607  | 40.18    |
| Thermalito Total | CADWR                         | 0.10     | 43        | -121.638                                  | 39.458                          |                                                   |                        |              |              |                     |          |                                     |                    |           |          |
| Yuba             | Yuba at Smartville            | -121.274 | 39.235    | 1.85                                      | 8                               | 2849                                              | 10                     | 20           | 5            | New Bullards Bar    | YCWA     | 1.19                                | 599                | -121.14   | 39.393   |
|                  |                               |          |           |                                           |                                 |                                                   |                        |              |              | Lake Spaulding      | YBDS     | 0.18                                | 1643               | -120.658  | 39.441   |
|                  |                               |          |           |                                           |                                 |                                                   |                        |              |              | Englebright         | USACE    | 0.09                                | 168                | -121.267  | 39.239   |
|                  |                               |          |           |                                           |                                 |                                                   |                        |              |              | Jackson Meadows     | YBDS     | 0.09                                | 1840               | -120.552  | 39.509   |
|                  |                               |          |           |                                           |                                 |                                                   |                        |              |              | Scotts Flat         | YBDS     | 0.06                                | 940                | -120.917  | 39.274   |
|                  |                               |          |           |                                           |                                 |                                                   |                        |              |              | French Lake         | YBDS     | 0.02                                | 2031               | -120.544  | 39.44    |
|                  |                               |          |           |                                           |                                 |                                                   |                        |              |              | Rollins             | YBDS     | 0.08                                | 663                | -120.948  | 39.135   |
| Bowman           | YBDS                          | 0.08     | 1697      | -120.652                                  | 39.45                           |                                                   |                        |              |              |                     |          |                                     |                    |           |          |
| American         | American at Folsom            | -121.183 | 38.683    | 2.17                                      | 12                              | 4882                                              | 10                     | 28           | 17           | Folsom              | USBR     | 1.21                                | 142                | -121.183  | 38.683   |
|                  |                               |          |           |                                           |                                 |                                                   |                        |              |              | Natoma              | USBR     | 0.01                                | 40                 | -121.183  | 38.65    |
|                  |                               |          |           |                                           |                                 |                                                   |                        |              |              | Union Valley        | SMUD     | 0.33                                | 1484               | -120.438  | 38.864   |
|                  |                               |          |           |                                           |                                 |                                                   |                        |              |              | Hell Hole           | PCWA     | 0.26                                | 1411               | -120.407  | 39.058   |
|                  |                               |          |           |                                           |                                 |                                                   |                        |              |              | French Meadows      | PCWA     | 0.17                                | 1604               | -120.468  | 39.112   |
|                  |                               |          |           |                                           |                                 |                                                   |                        |              |              | Loon                | SMUD     | 0.09                                | 1954               | -120.323  | 38.983   |
|                  |                               |          |           |                                           |                                 |                                                   |                        |              |              | Ice House           | SMUD     | 0.05                                | 1662               | -120.359  | 38.824   |
|                  |                               |          |           |                                           |                                 |                                                   |                        |              |              | Caples              | EDID     | 0.03                                | 2377               | -120.048  | 38.707   |
|                  |                               |          |           |                                           |                                 |                                                   |                        |              |              | Stumpy Meadows      | GDPUD    | 0.02                                | 1302               | -120.603  | 38.903   |
|                  |                               |          |           |                                           |                                 |                                                   |                        |              |              | Slab Creek          | SMUD     | 0.02                                | 564                | -120.6994 | 38.7725  |
|                  |                               |          |           |                                           |                                 |                                                   |                        |              |              | Silver              | EDID     | 0.01                                | 2174               | -120.121  | 38.669   |
|                  |                               |          |           |                                           |                                 |                                                   |                        |              |              | Lake Valley         | YBDS     | 0.01                                | 1785               | -120.583  | 39.3     |
|                  |                               |          |           |                                           |                                 |                                                   |                        |              |              | Jenkinson           | EDID     | 0.05                                | 1061               | -120.56   | 38.713   |
| Mokelumne        | Mokelumne at Pardee           | -120.719 | 38.313    | 1.07                                      | 4                               | 1603                                              | 8                      | 19           | 10           | Camanche            | EBMUD    | 0.51                                | 72                 | -121.021  | 38.225   |
|                  |                               |          |           |                                           |                                 |                                                   |                        |              |              | Pardee              | EBMUD    | 0.26                                | 173                | -120.85   | 38.25    |
|                  |                               |          |           |                                           |                                 |                                                   |                        |              |              | Salt Springs        | PGE      | 0.18                                | 1128               | -120.216  | 38.497   |
|                  |                               |          |           |                                           |                                 |                                                   |                        |              |              | Lower Bear          | PGE      | 0.06                                | 1775               | -120.257  | 38.538   |
| Stanislaus       | Stanislaus at Melones         | -120.637 | 37.852    | 3.5                                       | 8                               | 2331                                              | 9                      | 17           | 10           | New Melones         | USBR     | 2.96                                | 346                | -120.525  | 37.9481  |
|                  |                               |          |           |                                           |                                 |                                                   |                        |              |              | New Spicer Meadows  | NCPA     | 0.23                                | 1986               | -119.998  | 38.393   |
|                  |                               |          |           |                                           |                                 |                                                   |                        |              |              | Beardeley           | TriDam   | 0.12                                | 1036               | -120.075  | 38.203   |
|                  |                               |          |           |                                           |                                 |                                                   |                        |              |              | Tulloch             | TriDam   | 0.08                                | 157                | -120.603  | 37.875   |
|                  |                               |          |           |                                           |                                 |                                                   |                        |              |              | Donnells            | TriDam   | 0.08                                | 1474               | -119.96   | 38.329   |
|                  |                               |          |           |                                           |                                 |                                                   |                        |              |              | Pinecrest           | PGE      | 0.02                                | 1713               | -119.983  | 38.2     |
|                  |                               |          |           |                                           |                                 |                                                   |                        |              |              | Relief              | PGE      | 0.02                                | 2201               | -119.733  | 38.267   |
|                  |                               |          |           |                                           |                                 |                                                   |                        |              |              | Lyons               | PGE      | 0.01                                | 1260               | -120.166  | 38.094   |
| Tuolumne         | Tuolumne at Don Pedro         | -120.441 | 37.666    | 3.44                                      | 6                               | 3994                                              | 9                      | 21           | 10           | New Don Pedro       | TID      | 2.50                                | 253                | -120.421  | 37.702   |
|                  |                               |          |           |                                           |                                 |                                                   |                        |              |              | Hetch Hetchy        | SF       | 0.44                                | 1180               | -119.783  | 37.95    |
|                  |                               |          |           |                                           |                                 |                                                   |                        |              |              | Cherry              | SF       | 0.33                                | 1437               | -119.913  | 37.976   |
|                  |                               |          |           |                                           |                                 |                                                   |                        |              |              | Turlock             | TID      | 0.06                                | 74                 | -120.583  | 37.6     |
|                  |                               |          |           |                                           |                                 |                                                   |                        |              |              | Modesto             | MID      | 0.04                                | 64                 | -120.675  | 37.657   |
| Eleanor          | SF                            | 0.04     | 1420      | -119.88                                   | 37.974                          |                                                   |                        |              |              |                     |          |                                     |                    |           |          |
| Merced           | Merced at Exchequer           | -120.331 | 37.522    | 1.28                                      | 2                               | 2686                                              | 7                      | 13           | 11           | McClure             | MID      | 1.26                                | 264                | -120.267  | 37.584   |
|                  |                               |          |           |                                           |                                 |                                                   |                        |              |              | McSwain             | MID      | 0.01                                | 130                | -120.309  | 37.52    |
| San Joaquin      | San Joaquin at Friant         | -119.724 | 36.984    | 1.42                                      | 8                               | 4338                                              | 8                      | 21           | 16           | Millerton           | USBR     | 0.64                                | 177                | -119.705  | 37.001   |
|                  |                               |          |           |                                           |                                 |                                                   |                        |              |              | Shaver              | SCE      | 0.17                                | 1637               | -119.302  | 37.145   |
|                  |                               |          |           |                                           |                                 |                                                   |                        |              |              | Thomas A. Edison    | SCE      | 0.15                                | 2329               | -118.987  | 37.37    |
|                  |                               |          |           |                                           |                                 |                                                   |                        |              |              | Mammoth Pool        | SCE      | 0.15                                | 1015               | -119.328  | 37.329   |
|                  |                               |          |           |                                           |                                 |                                                   |                        |              |              | Huntington          | SCE      | 0.11                                | 2134               | -119.221  | 37.228   |
|                  |                               |          |           |                                           |                                 |                                                   |                        |              |              | Florence            | SCE      | 0.08                                | 2233               | -118.967  | 37.267   |
|                  |                               |          |           |                                           |                                 |                                                   |                        |              |              | Crane Valley        | PGE      | 0.06                                | 1030               | -119.517  | 37.283   |
| Redinger         | SCE                           | 0.04     | 428       | -119.449                                  | 37.145                          |                                                   |                        |              |              |                     |          |                                     |                    |           |          |
| Kings            | Kings at Pine Flat            | -119.335 | 36.831    | 1.53                                      | 3                               | 4002                                              | 8                      | 25           | 14           | Pine Flat           | USACE    | 1.23                                | 296                | -119.325  | 36.833   |
|                  |                               |          |           |                                           |                                 |                                                   |                        |              |              | Helms Creek         | PGE      | 0.15                                | 2497               | -118.967  | 37.072   |
| Wishon           | PGE                           | 0.16     | 1999      | -118.969                                  | 37.005                          |                                                   |                        |              |              |                     |          |                                     |                    |           |          |
| Kaweah           | Kaweah at Terminous           | -119.003 | 36.412    | 0.23                                      | 1                               | 1453                                              | 10                     | 16           | 8            | Kaweah              | USACE    | 0.23                                | 229                | -119.002  | 36.415   |
| Tule             | Tule at Success               | -118.922 | 36.061    | 0.1                                       | 1                               | 1018                                              | 10                     | 7            | 3            | Success             | USACE    | 0.10                                | 211                | -118.922  | 36.061   |
| Kern             | Kern at Isabella              | -118.484 | 35.639    | 0.7                                       | 1                               | 5372                                              | 8                      | 24           | 12           | Isabella            | USACE    | 0.70                                | 803                | -118.473  | 35.646   |

**Table S2. Individual fixed effects for the 14 basins in the panel data model**

| Basin       | Individual fixed effect ( $\mu_i$ ) | Robust standard error | t-Statistic | p-value |
|-------------|-------------------------------------|-----------------------|-------------|---------|
| Sacramento  | 2.540                               | 0.369                 | 6.883       | 0.000   |
| Feather     | 0.931                               | 0.364                 | 2.558       | 0.024   |
| Yuba        | 0.451                               | 0.323                 | 1.394       | 0.187   |
| American    | 0.810                               | 0.329                 | 2.461       | 0.029   |
| Cosumnes    | 0.125                               | 0.296                 | 0.422       | 0.680   |
| Mokolumne   | 0.273                               | 0.305                 | 0.895       | 0.387   |
| Stanislaus  | 0.289                               | 0.335                 | 0.863       | 0.404   |
| Tuolumne    | 0.207                               | 0.334                 | 0.620       | 0.546   |
| Merced      | 0.396                               | 0.305                 | 1.301       | 0.216   |
| San Joaquin | 0.538                               | 0.322                 | 1.669       | 0.119   |
| Kings       | 0.818                               | 0.326                 | 2.512       | 0.026   |
| Kawea       | 0.236                               | 0.396                 | 0.597       | 0.561   |
| Tule        | 0.066                               | 0.385                 | 0.172       | 0.866   |
| Kern        | 0.326                               | 0.420                 | 0.776       | 0.452   |
